# Supplementary material
Source: publisher site journal article supplement (https://www.dovepress.com/article/234094)
Supplement: Supplementary file 1 [file get_supplementary_file.php]

## Appendix I - Interview guide - patients

The questions of the interview will be semi-structured, allowing interviewees to respond in their own words.

#### Topic list patients - Questions relating to experiences of taking medicines:

1. You have recently received new medication, what are your experiences?
2. What do you think/how do you feel about your medication?
   1. Do you believe that the medication will work?
   2. Are you worried about your medication or possible side effects?
3. Which goals do you personally want to achieve by aid of your medication to be able to do (again)?
   1. 🡪 If patient indicates that he/she has no specific goal, or has never been thinking about that: now I’m asking you this, is there anything coming across your mind?
4. How do you take your medication?
   1. Are there any situations when it is easier or more difficult for you to take your medication? What tips and tricks can you share in taking your medication at the right time? Otherwise, can you explain why it is difficult for you? If applicable: What solutions have you tried?
5. Are there any advantages or disadvantages from this medication for you?
   1. If yes, which and why?
   2. How do you feel that it works?
   3. Do you experience any side-effects? If yes; which?
6. Do you have any questions regarding your medication?
7. What can I do for you?
8. How do you feel/what do you think about this conversation?

## Interview guide – pharmacists

The questions of the pharmacist interview will also be semi-structured, allowing interviewees to respond in their own words.

#### Topic list pharmacists- experiences with the interviews

1. What do you think about the patient interviews?
2. How did you organise the patient interviews in daily practice? (eg delegation of tasks, preparation, find the right moment, time investment)
3. Which interview did you enjoy or motivated you the most for future care or which conversation gave you the feeling to be of additional value as a healthcare provider? Why?
